# Supplementary material
Source: PubMed Central journal article supplement (PMC3200554)
Supplement: NIHMS318495-supplement-1_si_001.pdf [file NIHMS318495-supplement-1_si_001.pdf]

(Supporting Information)

# A Strategy for Increasing Drug Solubility and Efficacy through Covalent Attachment to Polyvalent DNA- Nanoparticle Conjugates

*Xue-Qing Zhang,<sup>†,+</sup> Xiaoyang Xu,<sup>‡,+</sup> Robert Lam,<sup>§</sup> David Giljohann,<sup>‡</sup> Dean Ho,<sup>\*,†,§,⊥</sup> and Chad A.  
Mirkin<sup>\*,‡,†</sup>*

<sup>†</sup>Department of Biomedical Engineering, <sup>‡</sup>Department of Chemistry, <sup>§</sup>Department of Mechanical Engineering, Northwestern University, Evanston, Illinois 60208, and <sup>⊥</sup>Robert H. Lurie Comprehensive Cancer Center, Northwestern University, Chicago, Illinois 60611

\* To whom correspondence should be addressed. E-mail: chadnano@northwestern.edu; d-ho@northwestern.edu

<sup>+</sup> Xue-Qing Zhang and Xiaoyang Xu contributed equally to this work.

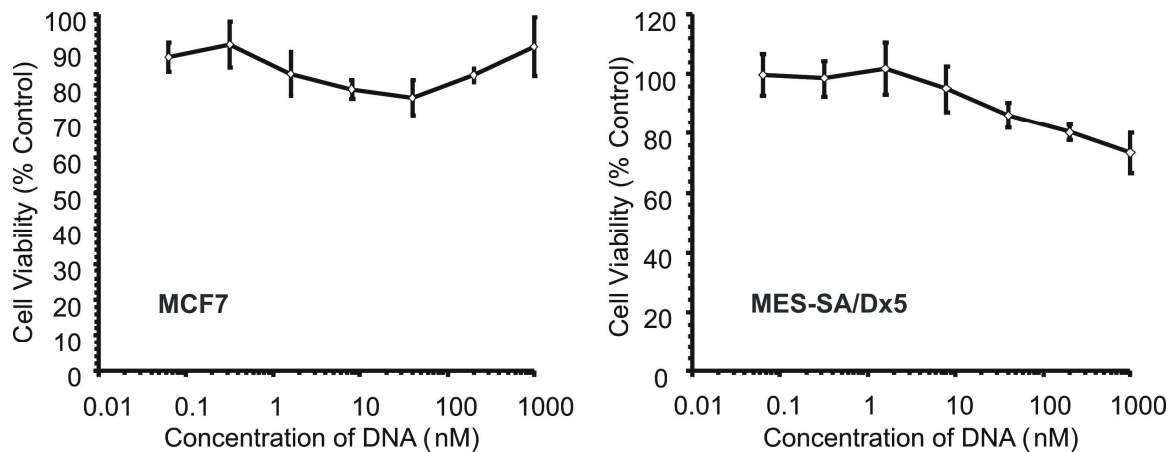

**Figure S1.** MTT assay of DNA-AuNPs containing equivalent oligonucleotide concentrations of 0.064, 0.32, 1.6, 8, 40, 200, 1000 nM after 48 h incubation in MCF7 (left) and MES-SA/Dx5 (right) cells (n=6).

**Table S1.** Hydrodynamic sizes of PTX-DNA@AuNPs **3** in filtered PBS buffer and EMEM at 25 °C and 37 °C.

|      | Incubation temperature (° C ) | Particle Size (nm) |
|------|-------------------------------|--------------------|
| PBS  | 25                            | 31.9 ± 1.3         |
|      | 37                            | 32.7 ± 1.1         |
| DMEM | 25                            | 32.8 ± 0.4         |
|      | 37                            | 33.1 ± 2.5         |
